# Supplementary material for: Cholinergic manipulations affect sensory responses but not attentional enhancement in macaque MT
Source: PubMed Central journal article supplement (PMC7967954; doi:10.1186/s12915-021-00993-7), 2021-03-16
Supplement: 12915_2021_993_MOESM1_ESM.pdf [file 12915_2021_993_MOESM1_ESM.pdf]

## Supplementary Material

In this study, we report an effect on firing rate of some single units (SUs) in MT after local injection of cholinergic agents. When we examined all recorded SUs, as well as the subset of SUs significantly affected by injections, we failed to find a significant effect on the magnitude of attentional modulation of firing rates. This was also the case when we divided the significantly affected subset into SUs with increased vs. decreased firing rates. As our main finding constitutes a null effect for a cholinergic influence on attentional modulation of firing rates in area MT, we carried out some further, exploratory analyses, some of which are depicted here.

First, we provide the results of our analysis pipeline applied to recordings during control injection of saline solution (Fig S1) to show that saline had no effect on firing rates in the sensory condition (stimulus present in receptive field; contrast change task performed at fixation), on average (Fig S1A,  $p=0.095$ ,  $W=129$ ,  $n=28$ ) and that the magnitude of attentional modulation was unchanged with injection (Fig S1B inset,  $p=0.479$ ,  $W=171$ ,  $n=28$ ).

Second, we provide the results of our analysis pipeline applied to the subsets of SUs for which firing rates in the sensory condition were significantly affected by injection of scopolamine (Fig S2A) and acetylcholine (Fig S2B). These populations are depicted in the main text in sub-groups split by whether the firing rate was increased or decreased. Despite the larger sample sizes, there is no significant effect on the magnitude of attentional modulation.

Third, we explored whether there might be a hidden interaction between the magnitudes of attentional and injection effects, for example that those MT cells most strongly affected by top-down attention are also more strongly affected by cholinergic manipulation. No such picture of results was evident, and we provide a plot (FigS3) of the magnitude of attentional modulation without injection (AMI control) against the magnitude of injection effect in the sensory condition (IMI fixation) as an example.

We furthermore investigated the possible influence of pharmacological parameters (volume of substance injected, concentration of substance) on the size of the injection effects. Fig S4 shows the magnitude of the injection effect in the sensory condition as a function of different concentrations and volumes for scopolamine. [We additionally analysed only those SUs for which the highest concentration was used (see Results & Discussion) and found no difference in results.] FigS5 shows the same data, additionally divided by inter-tip distance, for acetylcholine. Volume, concentration, and inter-tip distance do not appear to have a systematic effect on magnitude of injection effects.

Finally, when sample size allowed, we looked at some other measures that have previously been shown to be affected by attentional state (data not shown). Initial cursory analyses of Fano factor and burstiness (inter-spike intervals) did not reveal any significant

cholinergic modulation of attentional effects and were not pursued further. In addition, we looked at waveform parameters that have previously been used to putatively assign cell types to recorded neurons. A comparison of parameters derived from SUs for which a given injected substance increased vs. decreased firing rates did not result in significant differences for any estimated waveform parameter or substance.

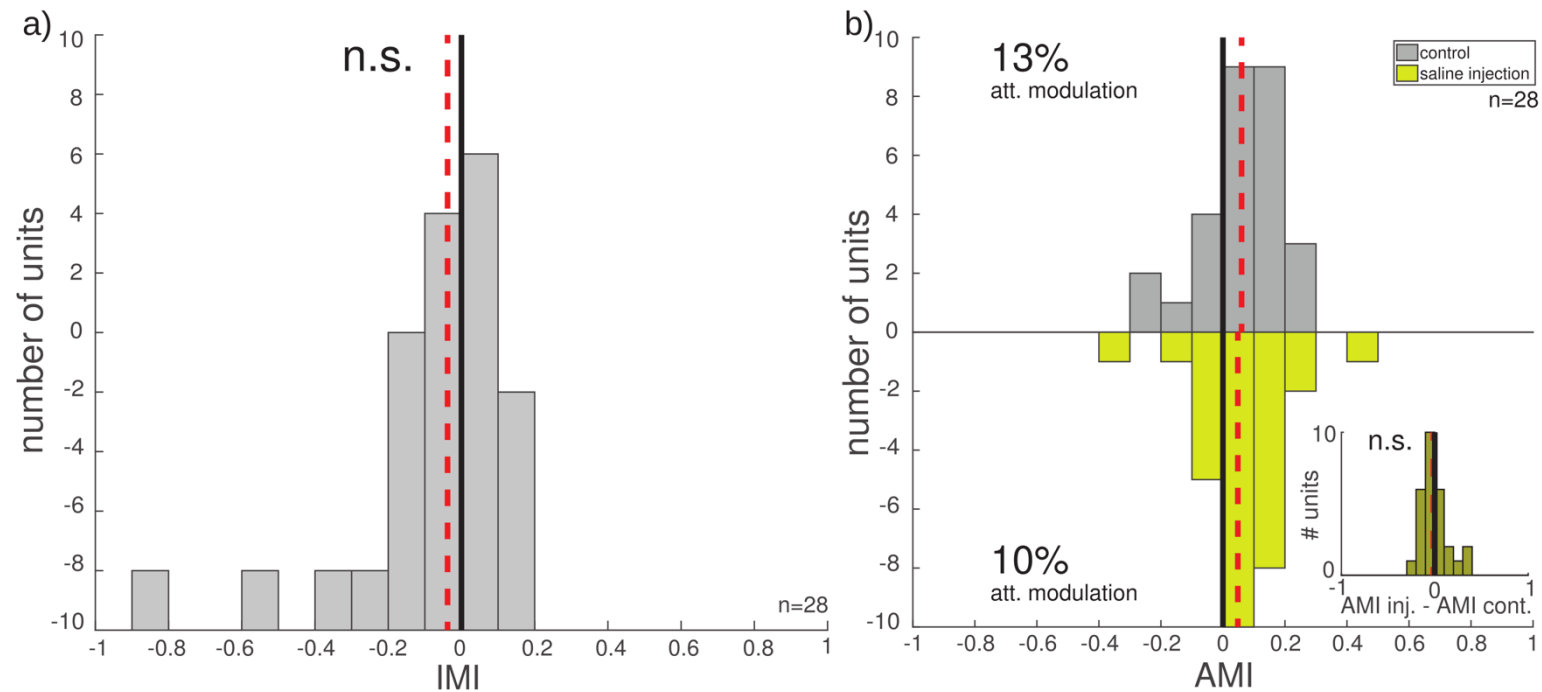

**Supplementary Figure 1: Results from control substance NaCl 1.** a) Distribution of saline injection modulation indices (IMI) during sensory condition. b) Distribution of attentional modulation (AMI) for the control (upper histogram) and the saline injection (lower histogram). Inset shows distribution of paired differences (injection minus control). Red vertical dashed lines indicate the median injection modulation. Shown data contains neuronal responses of single units from two monkeys for the preferred stimulus only.

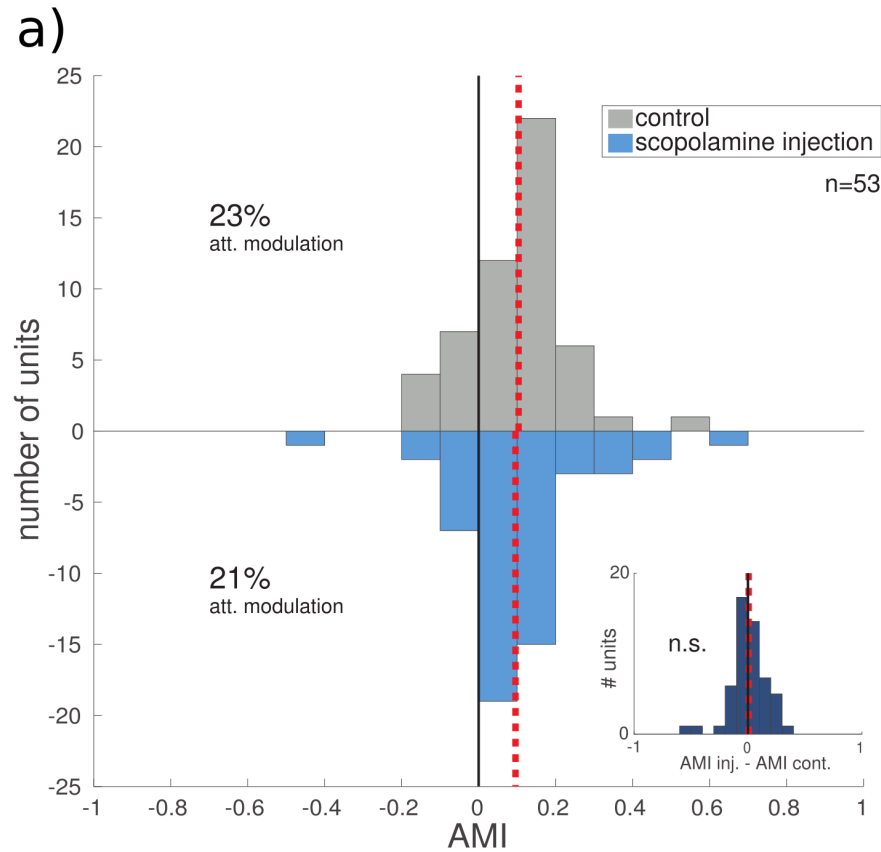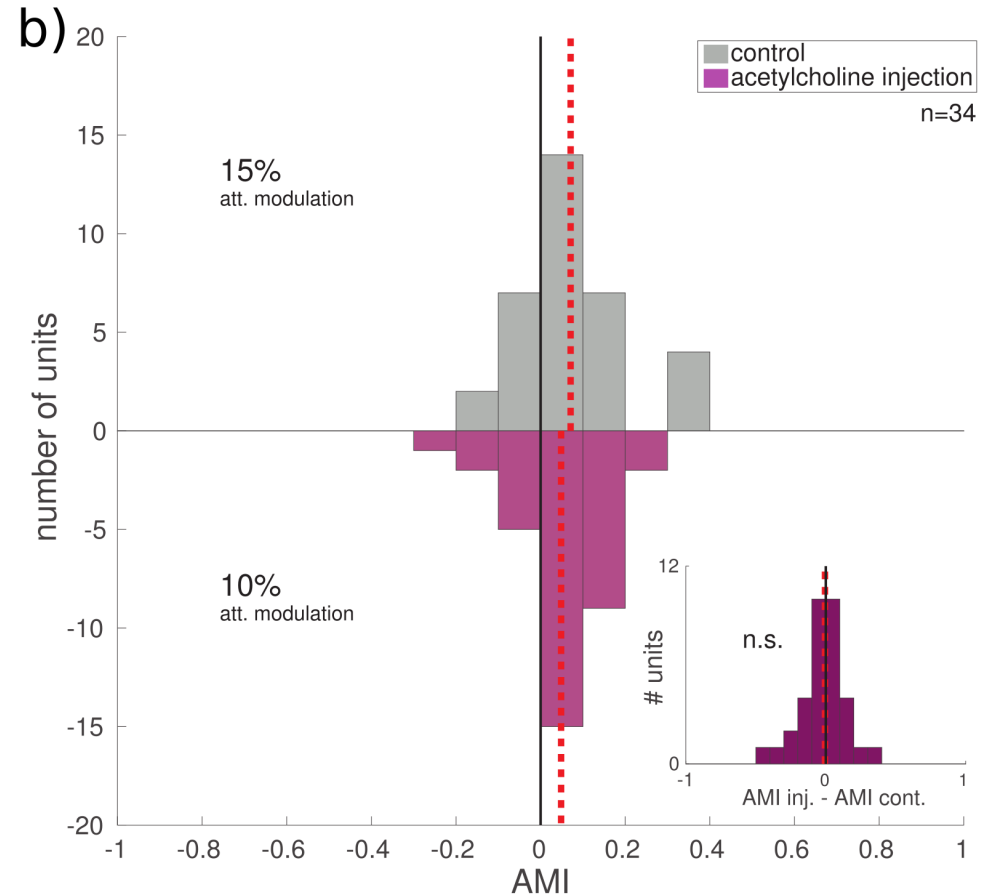

**Supplementary Figure 2: Effect of injected substance on the attentional modulation index (AMI) of pooled data significantly affected by injection** a) Histogram of attentional modulation index for control (upper histograms) and scopolamine injection blocks (lower histograms) for cells showing a significant effect on firing rate at the single-cell level due to scopolamine injection (pooling the data plotted as Fig 3c and d in the main text). Paired differences are illustrated in insets. Red vertical dashed lines indicate the median change of the population. b) As in panel a, but for acetylcholine injections (pooling the data plotted as Fig 4c and d in the main text).

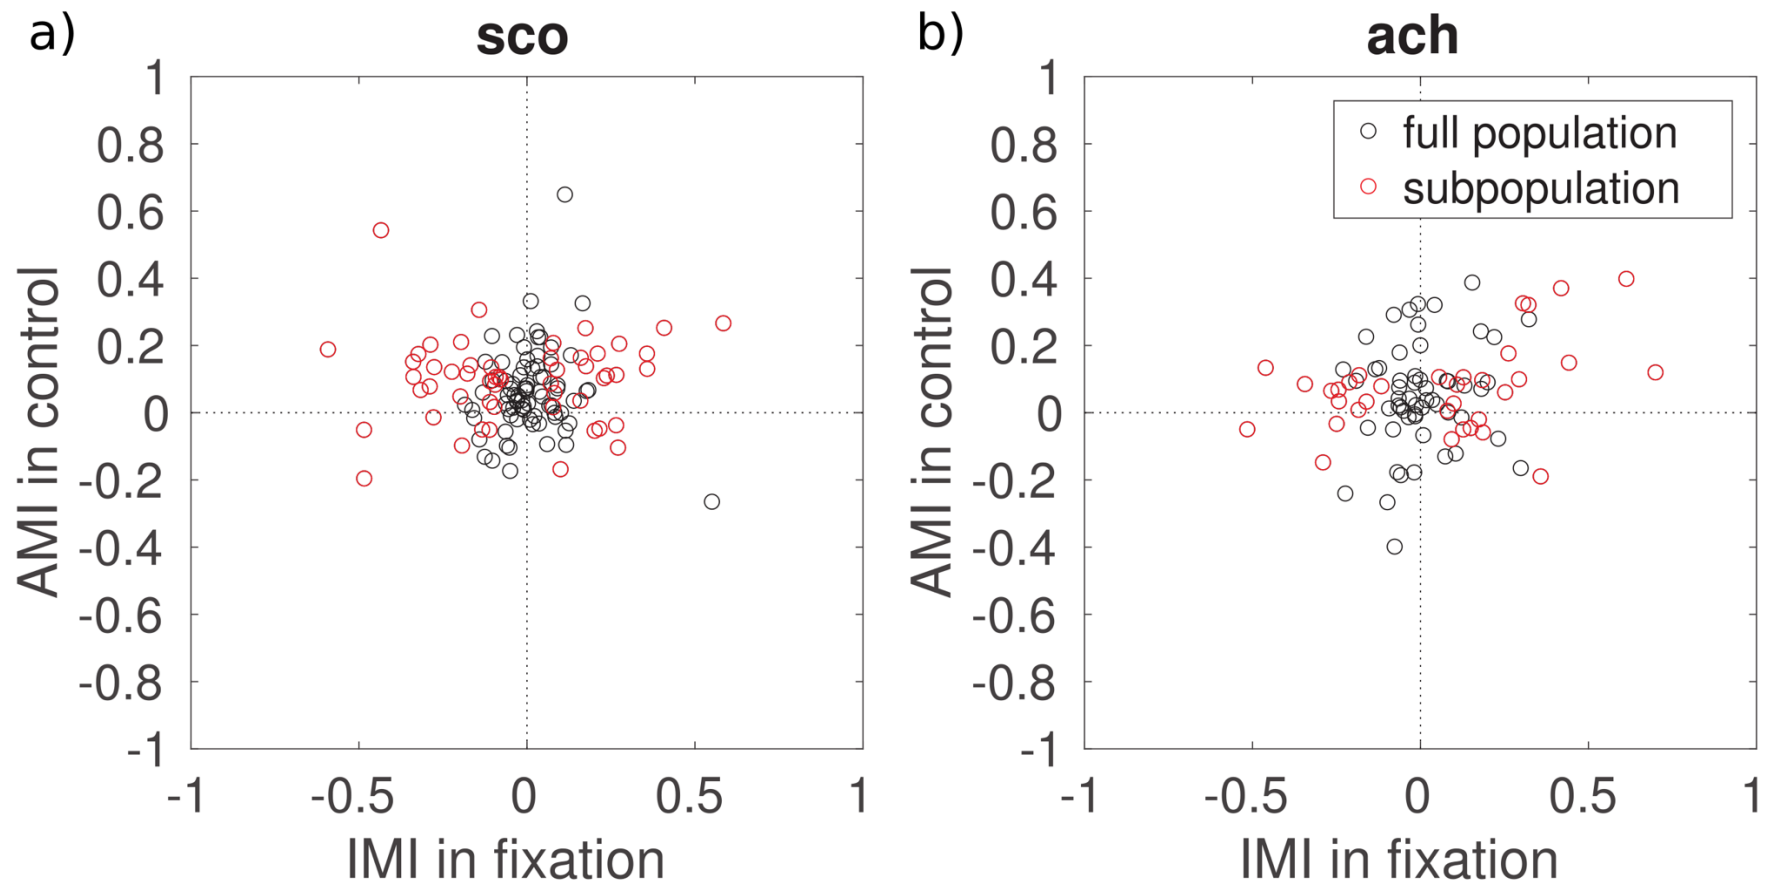

**Supplementary Figure 3: Lack of relationship between injection and attention effects** a) Scatter plot depicting the size of the attention effect before injection (y-axis) and the magnitude of the injection effect during the control sensory condition (x-axis) for single units (SUs) recorded during scopolamine pressure injection. Red dots show those SUs which were significantly affected by the injected substance, black dots were not. No apparent relationship between the magnitude of attentional modulation of a given cell and the size of the effect of the antagonist injection can be seen. b) As for a, for SUs recorded during injection of agonist acetylcholine.

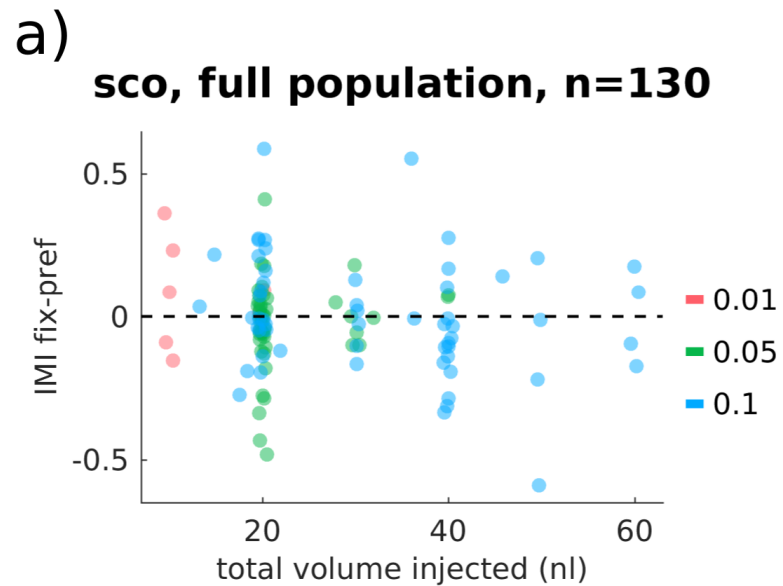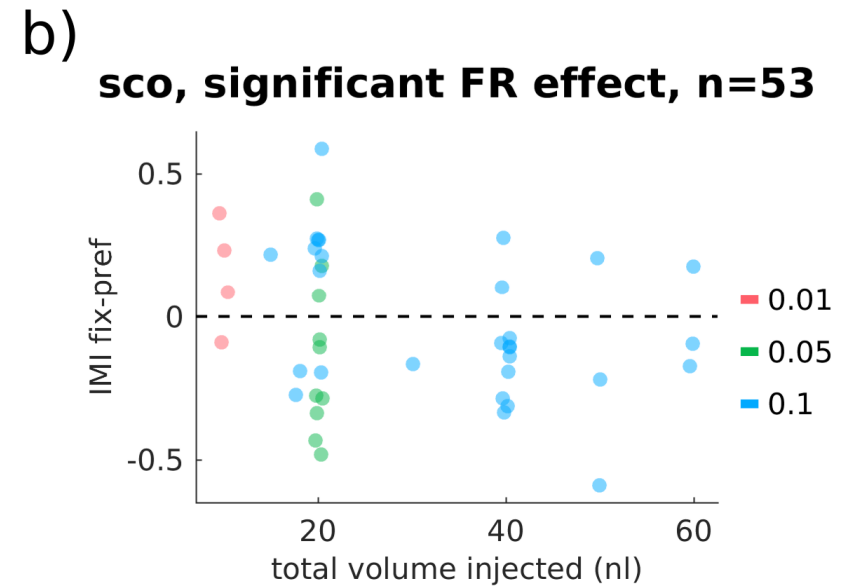

**Supplementary Figure 4: No apparent effect of scopolamine volume and concentration.** a) Each point depicts a single unit. The color indicates the concentration of scopolamine injected. X-axis plots total volume injected and the y-axis plots the magnitude of the injection effect in the control sensory condition. b) Subset of data plotted in panel a. Only units with significant firing rate modulations by scopolamine injection are plotted.

a) ach, full population, n=90

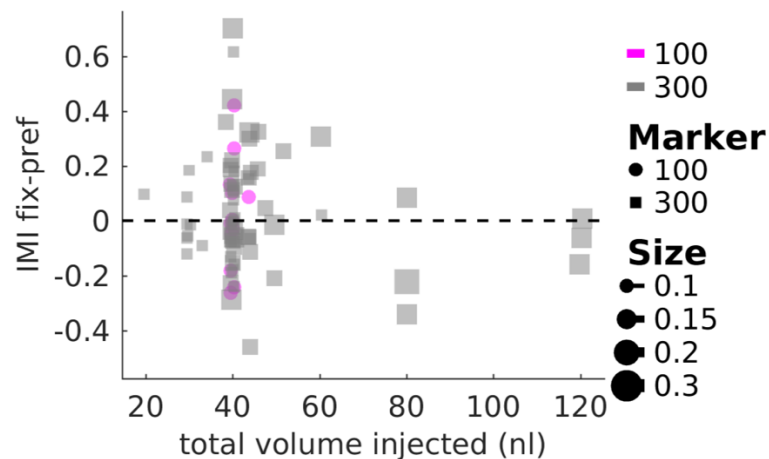

b) ach, significant FR effect, n=34

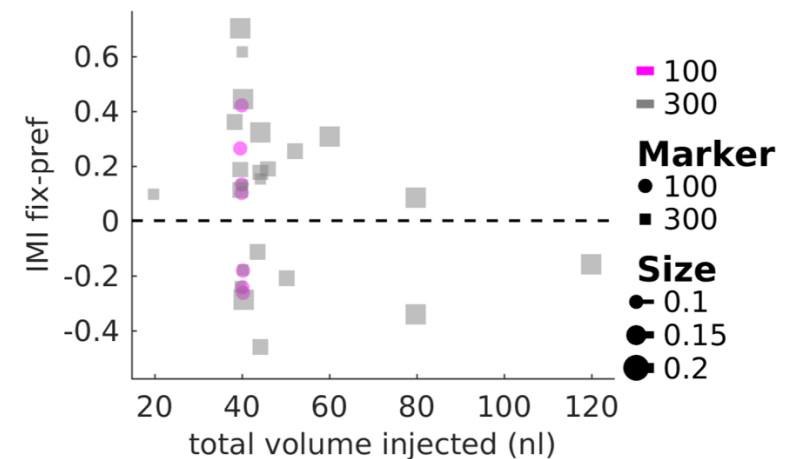

**Supplementary Figure 5: No apparent effect of acetylcholine volume and concentration or of inter-tip distance.** a) Each point depicts a single unit. The marker and color indicate the inter-tip distance. The size indicates the concentration of acetylcholine injected. X-axis plots total volume injected and the y-axis plots the magnitude of the injection effect in the control sensory condition. b) Subset of data plotted in panel a. Only units with significant firing rate modulations by acetylcholine injection are plotted.

**Following pages:**

**Supplementary Table 1: List of analysed SUs with pharmacological parameters used.** List of all cells analyzed with detailed information about the associated recordings.

**Supplementary Table 2: AMI and IMI values for analysed SUs.** List of all cells analyzed with values of attentional and injection modulation indices for each cell.

**Supplementary Table 1**

| FileName            | monkey | hemisphere | substance | concentration | nInjBlocks | totalVolInjected | interTipDistance_um | sigInjEffect | directionOfSigInjEffect |
|---------------------|--------|------------|-----------|---------------|------------|------------------|---------------------|--------------|-------------------------|
| s1-pie-015-01+01_2a | P      | L          | sc0       | 0.1           | 3          | 51               | 300                 | 1            | decrease                |
| s1-pie-022-01+01_3a | P      | L          | sc0       | 0.1           | 3          | 43               | 300                 | 0            |                         |
| s1-pie-023-01+02_2a | P      | L          | sc0       | 0.1           | 2          | 30               | 300                 | 1            | increase                |
| s1-pie-023-01+03_2a | P      | L          | sc0       | 0.1           | 1          | 19               | 300                 | 0            |                         |
| s1-pie-026-01+01_3a | P      | L          | sc0       | 0.1           | 2          | 31               | 300                 | 0            |                         |
| s1-pie-027-01+01_3a | P      | L          | sc0       | 0.1           | 1          | 18               | 300                 | 1            | decrease                |
| s1-pie-030-01+01_2a | P      | L          | sc0       | 0.1           | 1          | 13               | 300                 | 0            |                         |
| s1-pie-031-01+01_2a | P      | L          | sc0       | 0.1           | 1          | 18               | 300                 | 1            | decrease                |
| s1-pie-032-01+01_2a | P      | L          | sc0       | 0.1           | 2          | 29               | 300                 | 1            | increase                |
| s1-pie-035-01+01_2a | P      | L          | sc0       | 0.1           | 3          | 41               | 300                 | 1            | increase                |
| s1-pie-037-01+02_2a | P      | L          | sc0       | 0.01          | 1          | 10               | 300                 | 1            | increase                |
| s1-pie-037-01+02_2b | P      | L          | sc0       | 0.01          | 1          | 10               | 300                 | 1            | increase                |
| s1-pie-037-01+02_3a | P      | L          | sc0       | 0.01          | 1          | 10               | 300                 | 0            |                         |
| s2-pie-017-02+01_2a | P      | R          | sc0       | 0.05          | 2          | 40               | 300                 | 0            |                         |
| s2-pie-018-01+01_1a | P      | R          | sc0       | 0.05          | 1          | 20               | 300                 | 1            | increase                |
| s2-pie-018-01+01_2a | P      | R          | sc0       | 0.05          | 1          | 20               | 300                 | 1            | increase                |
| s2-pie-019-01+01_1a | P      | R          | sc0       | 0.05          | 2          | 40               | 300                 | 0            |                         |
| s2-pie-020-01+99_1a | P      | R          | sc0       | 0.05          | 2          | 40               | 300                 | 0            |                         |
| s2-pie-023-01+03_1a | P      | R          | sc0       | 0.05          | 1          | 20               | 300                 | 0            |                         |
| s2-pie-024-01+02_2b | P      | R          | sc0       | 0.05          | 1          | 20               | 300                 | 0            |                         |
| s2-pie-024-02+02_1a | P      | R          | sc0       | 0.05          | 1          | 20               | 300                 | 0            |                         |
| s2-pie-035-01+99_1a | P      | R          | sc0       | 0.05          | 2          | 40               | 300                 | 0            |                         |
| s2-pie-039-01+02_1a | P      | R          | sc0       | 0.05          | 1          | 20               | 300                 | 1            | decrease                |
| s2-pie-041-02+02_2a | P      | R          | sc0       | 0.05          | 1          | 20               | 300                 | 0            |                         |
| s2-pie-044-01+03_2a | P      | R          | sc0       | 0.05          | 2          | 40               | 300                 | 0            |                         |
| s2-pie-044-01+03_2b | P      | R          | sc0       | 0.05          | 2          | 40               | 300                 | 1            | decrease                |
| s2-pie-045-01+03_1a | P      | R          | sc0       | 0.05          | 1          | 20               | 300                 | 0            |                         |
| s2-pie-045-02+03_1a | P      | R          | sc0       | 0.05          | 1          | 20               | 300                 | 0            |                         |
| s2-pie-045-02+03_2a | P      | R          | sc0       | 0.05          | 1          | 20               | 300                 | 0            |                         |
| s2-pie-045-02+03_2b | P      | R          | sc0       | 0.05          | 1          | 20               | 300                 | 0            |                         |
| s2-pie-048-01+04_1a | P      | R          | sc0       | 0.05          | 1          | 20               | 300                 | 0            |                         |
| s2-pie-053-03+02_1a | P      | R          | sc0       | 0.05          | 1          | 32               | 300                 | 0            |                         |
| s2-pie-054-01+02_2a | P      | R          | sc0       | 0.05          | 1          | 20               | 300                 | 1            | increase                |
| s2-pie-055-01+02_1a | P      | R          | sc0       | 0.05          | 1          | 20               | 300                 | 0            |                         |
| s2-pie-055-01+02_1b | P      | R          | sc0       | 0.05          | 1          | 20               | 300                 | 0            |                         |
| s2-pie-055-02+02_1a | P      | R          | sc0       | 0.05          | 1          | 20               | 300                 | 0            |                         |
| s2-pie-055-02+02_1b | P      | R          | sc0       | 0.05          | 1          | 20               | 300                 | 0            |                         |

|                     |   |   |      |      |   |     |     |   |          |
|---------------------|---|---|------|------|---|-----|-----|---|----------|
| s2-pie-058-01+02_1a | P | R | sco  | 0.05 | 1 | 20  | 300 | 0 |          |
| s2-pie-059-01+02_1a | P | R | sco  | 0.05 | 1 | 20  | 300 | 0 |          |
| s2-pie-059-01+02_1b | P | R | sco  | 0.05 | 1 | 20  | 300 | 0 |          |
| s2-pie-060-01+02_1a | P | R | sco  | 0.05 | 1 | 20  | 300 | 0 |          |
| s2-pie-061-02+02_1a | P | R | sco  | 0.05 | 1 | 20  | 300 | 0 |          |
| s2-pie-067-03+01_1a | P | R | sco  | 0.05 | 1 | 30  | 300 | 0 |          |
| s2-pie-067-03+01_2a | P | R | sco  | 0.05 | 1 | 30  | 300 | 0 |          |
| s2-pie-075-01+01_1a | P | R | sco  | 0.05 | 1 | 20  | 300 | 0 |          |
| s3-pie-001-01+02_3a | P | L | sco  | 0.01 | 2 | 20  | 300 | 1 | increase |
| s3-pie-001-01+99_2a | P | L | sco  | 0.01 | 3 | 30  | 300 | 1 | decrease |
| s3-pie-005-01+01_3a | P | L | sco  | 0.1  | 1 | 20  | 300 | 0 |          |
| s3-pie-006-01+01_3b | P | L | sco  | 0.1  | 1 | 22  | 300 | 0 |          |
| s3-pie-009-01+01_3a | P | L | sco  | 0.01 | 1 | 20  | 300 | 0 |          |
| s3-pie-012-01+01_3a | P | L | sco  | 0.01 | 2 | 40  | 300 | 0 |          |
| s3-pie-014-01+01_2a | P | L | sco  | 0.1  | 1 | 20  | 300 | 0 |          |
| s3-pie-014-01+03_2a | P | L | sco  | 0.1  | 2 | 40  | 300 | 0 |          |
| s3-pie-017-01+01_3a | P | L | sco  | 0.1  | 1 | 40  | 300 | 1 | decrease |
| s3-pie-018-01+01_3a | P | L | sco  | 0.1  | 3 | 100 | 300 | 1 | decrease |
| s3-pie-018-01+01_3b | P | L | sco  | 0.1  | 3 | 100 | 300 | 0 |          |
| s3-pie-020-01+01_1a | P | L | sco  | 0.1  | 1 | 40  | 300 | 1 | decrease |
| s3-pie-020-01+02_1a | P | L | sco  | 0.1  | 1 | 40  | 300 | 1 | decrease |
| s3-pie-021-01+01_1a | P | L | sco  | 0.05 | 1 | 20  | 300 | 1 | decrease |
| s3-pie-023-01+01_1a | P | L | sco  | 0.05 | 2 | 30  | 300 | 1 | increase |
| s3-pie-023-01+01_3a | P | L | sco  | 0.05 | 2 | 30  | 300 | 0 |          |
| s3-pie-037-01+01_3a | P | L | sco  | 0.05 | 1 | 40  | 300 | 0 |          |
| s2-pie-032-02+02_2a | P | R | nacl | 0.9  | 2 | 40  | 300 | 0 |          |
| s2-pie-037-01+01_1a | P | R | nacl | 0.9  | 1 | 24  | 300 | 0 |          |
| s2-pie-046-01+03_2a | P | R | nacl | 0.9  | 1 | 20  | 300 | 0 |          |
| s2-pie-063-03+01_1a | P | R | nacl | 0.9  | 1 | 20  | 300 | 0 |          |
| s2-pie-080-01+02_1a | P | R | nacl | 0.9  | 1 | 20  | 300 | 1 | decrease |
| s2-pie-083-02+01_1a | P | R | ach  | 0.1  | 1 | 30  | 300 | 0 |          |
| s2-pie-085-01+02_2a | P | R | ach  | 0.1  | 1 | 30  | 300 | 0 |          |
| s2-pie-086-04+01_1a | P | R | ach  | 0.1  | 1 | 33  | 300 | 0 |          |
| s2-pie-089-02+01_1a | P | R | ach  | 0.1  | 2 | 63  | 300 | 1 | increase |
| s2-pie-090-01+02_2a | P | R | ach  | 0.1  | 1 | 30  | 300 | 0 |          |
| s2-pie-090-01+02_2b | P | R | ach  | 0.1  | 1 | 30  | 300 | 0 |          |
| s1-osk-125-03+01_1a | O | L | sco  | 0.1  | 1 | 30  | 100 | 0 |          |
| s1-osk-125-03+01_2a | O | L | sco  | 0.1  | 1 | 30  | 100 | 0 |          |



|                     |   |   |     |      |   |    |     |   |          |
|---------------------|---|---|-----|------|---|----|-----|---|----------|
| s1-osk-204-02+01_2a | O | L | SCO | 0.1  | 1 | 40 | 100 | 0 |          |
| s1-osk-205-01+01_2b | O | L | SCO | 0.1  | 1 | 40 | 100 | 1 | decrease |
| s1-osk-206-01+01_1a | O | L | SCO | 0.1  | 1 | 40 | 100 | 0 |          |
| s1-osk-207-02+01_2a | O | L | SCO | 0.1  | 1 | 36 | 100 | 0 |          |
| s1-osk-207-02+01_2b | O | L | SCO | 0.1  | 1 | 36 | 100 | 0 |          |
| s1-osk-208-01+01_1a | O | L | SCO | 0.1  | 1 | 50 | 100 | 0 |          |
| s1-osk-208-01+01_2a | O | L | SCO | 0.1  | 1 | 50 | 100 | 1 | decrease |
| s1-osk-209-01+01_1a | O | L | SCO | 0.1  | 1 | 40 | 100 | 1 | increase |
| s1-osk-210-01+01_1a | O | L | SCO | 0.1  | 1 | 46 | 100 | 0 |          |
| s1-osk-211-01+01_1a | O | L | SCO | 0.1  | 1 | 50 | 100 | 1 | decrease |
| s1-osk-211-01+01_2a | O | L | SCO | 0.1  | 1 | 50 | 100 | 1 | increase |
| s1-osk-212-01+01_1a | O | L | SCO | 0.1  | 1 | 40 | 100 | 1 | decrease |
| s1-osk-213-01+01_1a | O | L | SCO | 0.1  | 1 | 40 | 100 | 0 |          |
| s1-osk-214-01+01_1a | O | L | SCO | 0.1  | 1 | 40 | 100 | 1 | decrease |
| s1-osk-215-01+01_2a | O | L | SCO | 0.1  | 1 | 40 | 100 | 1 | decrease |
| s2-osk-010-02+01_2a | O | R | SCO | 0.05 | 1 | 20 | 300 | 1 | decrease |
| s2-osk-013-03+02_2a | O | R | SCO | 0.05 | 2 | 40 | 300 | 0 |          |
| s2-osk-014-03+01_2a | O | R | SCO | 0.05 | 1 | 30 | 300 | 0 |          |
| s2-osk-015-01+01_2a | O | R | SCO | 0.05 | 1 | 30 | 300 | 0 |          |
| s2-osk-016-03+01_1a | O | R | SCO | 0.05 | 1 | 28 | 300 | 0 |          |
| s2-osk-018-03+01_1a | O | R | SCO | 0.05 | 1 | 30 | 300 | 0 |          |
| s2-osk-019-01+01_2a | O | R | SCO | 0.05 | 1 | 20 | 300 | 0 |          |
| s2-osk-021-02+01_2a | O | R | SCO | 0.05 | 1 | 20 | 300 | 0 |          |
| s2-osk-022-01+01_1a | O | R | SCO | 0.05 | 1 | 20 | 300 | 1 | decrease |
| s2-osk-022-01+01_2a | O | R | SCO | 0.05 | 1 | 20 | 300 | 1 | decrease |
| s2-osk-022-01+01_2b | O | R | SCO | 0.05 | 1 | 20 | 300 | 0 |          |
| s2-osk-023-01+01_1a | O | R | SCO | 0.05 | 1 | 40 | 300 | 0 |          |
| s2-osk-025-01+01_2a | O | R | SCO | 0.05 | 2 | 40 | 300 | 0 |          |
| s2-osk-026-01+01_2a | O | R | SCO | 0.05 | 3 | 60 | 300 | 1 | decrease |
| s2-osk-029-02+01_1a | O | R | SCO | 0.1  | 1 | 20 | 300 | 0 |          |
| s2-osk-029-02+01_1b | O | R | SCO | 0.1  | 1 | 20 | 300 | 1 | decrease |
| s2-osk-029-02+01_2a | O | R | SCO | 0.1  | 1 | 20 | 300 | 1 | increase |
| s2-osk-030-01+01_1a | O | R | SCO | 0.1  | 2 | 50 | 300 | 0 |          |
| s2-osk-031-01+01_1a | O | R | SCO | 0.1  | 1 | 20 | 300 | 1 | increase |
| s2-osk-032-01+01_1a | O | R | SCO | 0.1  | 1 | 20 | 300 | 0 |          |
| s2-osk-034-01+01_1a | O | R | SCO | 0.1  | 1 | 20 | 300 | 0 |          |
| s2-osk-036-01+01_1a | O | R | SCO | 0.1  | 1 | 20 | 300 | 0 |          |
| s2-osk-038-01+01_1a | O | R | SCO | 0.1  | 1 | 20 | 300 | 1 | increase |

|                     |   |   |      |     |   |     |     |   |          |
|---------------------|---|---|------|-----|---|-----|-----|---|----------|
| s2-osk-038-01+01_1b | O | R | sc0  | 0.1 | 1 | 20  | 300 | 1 | increase |
| s2-osk-038-02+01_1a | O | R | sc0  | 0.1 | 1 | 30  | 300 | 0 |          |
| s2-osk-039-01+01_2a | O | R | sc0  | 0.1 | 1 | 30  | 300 | 0 |          |
| s2-osk-040-01+01_2b | O | R | sc0  | 0.1 | 1 | 20  | 300 | 1 | increase |
| s2-osk-040-01+99_2a | O | R | sc0  | 0.1 | 2 | 40  | 300 | 0 |          |
| s2-osk-041-02+01_1a | O | R | sc0  | 0.1 | 1 | 20  | 300 | 0 |          |
| s2-osk-041-02+01_1b | O | R | sc0  | 0.1 | 1 | 20  | 300 | 1 | increase |
| s2-osk-042-02+01_1a | O | R | sc0  | 0.1 | 2 | 50  | 300 | 0 |          |
| s2-osk-042-02+01_2a | O | R | sc0  | 0.1 | 2 | 50  | 300 | 0 |          |
| s2-osk-048-01+01_1a | O | R | sc0  | 0.1 | 2 | 50  | 300 | 0 |          |
| s2-osk-049-01+01_1a | O | R | sc0  | 0.1 | 2 | 40  | 300 | 0 |          |
| s2-osk-049-01+01_2b | O | R | sc0  | 0.1 | 2 | 40  | 300 | 1 | increase |
| s2-osk-051-01+01_2a | O | R | sc0  | 0.1 | 3 | 70  | 300 | 1 | increase |
| s2-osk-052-01+01_2a | O | R | sc0  | 0.1 | 2 | 50  | 300 | 1 | increase |
| s2-osk-053-01+01_1a | O | R | sc0  | 0.1 | 1 | 30  | 300 | 1 | decrease |
| s2-osk-054-02+01_2a | O | R | sc0  | 0.1 | 1 | 30  | 300 | 0 |          |
| s2-osk-055-01+01_1a | O | R | sc0  | 0.1 | 2 | 80  | 300 | 0 |          |
| s2-osk-060-02+01_2a | O | R | sc0  | 0.1 | 1 | 60  | 300 | 1 | decrease |
| s2-osk-062-01+01_2a | O | R | sc0  | 0.1 | 1 | 40  | 300 | 1 | decrease |
| s2-osk-062-03+01_1a | O | R | sc0  | 0.1 | 1 | 40  | 300 | 1 | decrease |
| s2-osk-070-01+01_1a | O | R | sc0  | 0.1 | 1 | 60  | 300 | 1 | increase |
| s2-osk-071-01+01_2a | O | R | sc0  | 0.1 | 1 | 40  | 300 | 0 |          |
| s2-osk-071-02+01_1a | O | R | sc0  | 0.1 | 1 | 40  | 300 | 1 | increase |
| s2-osk-072-01+01_1a | O | R | sc0  | 0.1 | 1 | 60  | 300 | 1 | decrease |
| s2-osk-073-01+01_2a | O | R | sc0  | 0.1 | 2 | 100 | 300 | 1 | decrease |
| s2-osk-073-01+01_2b | O | R | sc0  | 0.1 | 2 | 100 | 300 | 1 | decrease |
| s2-osk-075-01+01_2a | O | R | sc0  | 0.1 | 2 | 100 | 300 | 1 | increase |
| s2-osk-076-01+01_2a | O | R | sc0  | 0.1 | 1 | 60  | 300 | 0 |          |
| s1-osk-202-01+01_2a | O | L | nacl | 0.9 | 1 | 40  | 100 | 0 |          |
| s2-osk-006-02+01_1a | O | R | nacl | 0.9 | 2 | 40  | 300 | 0 |          |
| s2-osk-006-02+01_1b | O | R | nacl | 0.9 | 2 | 40  | 300 | 1 | increase |
| s2-osk-007-01+02_2a | O | R | nacl | 0.9 | 1 | 20  | 300 | 0 |          |
| s2-osk-008-01+01_2a | O | R | nacl | 0.9 | 1 | 20  | 300 | 0 |          |
| s2-osk-011-02+01_2a | O | R | nacl | 0.9 | 1 | 20  | 300 | 0 |          |
| s2-osk-044-01+01_2a | O | R | nacl | 0.9 | 1 | 20  | 300 | 0 |          |
| s2-osk-044-02+01_2a | O | R | nacl | 0.9 | 1 | 20  | 300 | 1 | increase |
| s2-osk-044-02+01_2b | O | R | nacl | 0.9 | 1 | 20  | 300 | 0 |          |
| s2-osk-044-03+01_2a | O | R | nacl | 0.9 | 1 | 30  | 300 | 0 |          |

|                     |   |   |      |      |   |     |     |   |          |
|---------------------|---|---|------|------|---|-----|-----|---|----------|
| s2-osk-045-01+02_1a | O | R | nacl | 0.9  | 2 | 40  | 300 | 0 |          |
| s2-osk-045-01+02_2a | O | R | nacl | 0.9  | 2 | 40  | 300 | 1 | decrease |
| s2-osk-046-01+01_2a | O | R | nacl | 0.9  | 2 | 50  | 300 | 0 |          |
| s2-osk-066-01+01_1b | O | R | nacl | 0.9  | 1 | 32  | 300 | 0 |          |
| s2-osk-067-01+01_1a | O | R | nacl | 0.9  | 1 | 40  | 300 | 0 |          |
| s2-osk-067-02+01_1a | O | R | nacl | 0.9  | 1 | 40  | 300 | 0 |          |
| s2-osk-068-01+01_1a | O | R | nacl | 0.9  | 1 | 40  | 300 | 0 |          |
| s2-osk-069-01+01_1a | O | R | nacl | 0.9  | 1 | 40  | 300 | 0 |          |
| s2-osk-074-01+01_1a | O | R | nacl | 0.9  | 1 | 60  | 300 | 1 | decrease |
| s2-osk-074-01+01_1b | O | R | nacl | 0.9  | 1 | 60  | 300 | 1 | decrease |
| s2-osk-074-01+01_2a | O | R | nacl | 0.9  | 1 | 60  | 300 | 0 |          |
| s2-osk-074-02+01_1a | O | R | nacl | 0.9  | 1 | 60  | 300 | 0 |          |
| s2-osk-087-01+01_2a | O | R | nacl | 0.9  | 1 | 30  | 300 | 0 |          |
| s1-osk-090-01+01_2a | O | L | ach  | 0.1  | 1 | 40  | 300 | 0 |          |
| s1-osk-090-01+01_2b | O | L | ach  | 0.1  | 1 | 40  | 300 | 0 |          |
| s1-osk-091-01+01_2a | O | L | ach  | 0.1  | 1 | 30  | 300 | 0 |          |
| s1-osk-092-01+01_2a | O | L | ach  | 0.1  | 1 | 40  | 300 | 0 |          |
| s1-osk-094-01+01_1a | O | L | ach  | 0.1  | 1 | 40  | 300 | 0 |          |
| s1-osk-095-01+01_2a | O | L | ach  | 0.1  | 1 | 40  | 300 | 0 |          |
| s1-osk-095-01+01_2b | O | L | ach  | 0.1  | 1 | 40  | 300 | 0 |          |
| s1-osk-098-01+02_2b | O | L | ach  | 0.2  | 1 | 40  | 300 | 1 | increase |
| s1-osk-100-02+01_1a | O | L | ach  | 0.2  | 1 | 40  | 300 | 0 |          |
| s1-osk-106-01+01_1a | O | L | ach  | 0.15 | 2 | 80  | 300 | 0 |          |
| s1-osk-107-02+01_1a | O | L | ach  | 0.15 | 1 | 40  | 300 | 0 |          |
| s1-osk-109-01+01_1a | O | L | ach  | 0.15 | 1 | 40  | 300 | 0 |          |
| s1-osk-110-01+01_1a | O | L | ach  | 0.15 | 1 | 40  | 300 | 0 |          |
| s1-osk-115-01+01_1a | O | L | ach  | 0.15 | 1 | 40  | 300 | 0 |          |
| s1-osk-115-01+01_1b | O | L | ach  | 0.15 | 1 | 40  | 300 | 0 |          |
| s1-osk-116-01+01_1a | O | L | ach  | 0.15 | 1 | 40  | 300 | 0 |          |
| s1-osk-117-01+01_1a | O | L | ach  | 0.15 | 3 | 140 | 300 | 0 |          |
| s1-osk-130-01+01_1a | O | L | ach  | 0.2  | 1 | 60  | 300 | 1 | increase |
| s1-osk-132-01+01_2a | O | L | ach  | 0.2  | 1 | 44  | 300 | 1 | increase |
| s1-osk-134-02+01_1b | O | L | ach  | 0.2  | 1 | 40  | 300 | 1 | increase |
| s1-osk-134-03+01_1a | O | L | ach  | 0.2  | 1 | 50  | 300 | 0 |          |
| s1-osk-136-01+01_2a | O | L | ach  | 0.2  | 2 | 380 | 300 | 1 | increase |
| s1-osk-143-01+01_2b | O | L | ach  | 0.3  | 1 | 80  | 300 | 0 |          |
| s1-osk-145-01+01_1a | O | L | ach  | 0.2  | 1 | 80  | 300 | 1 | increase |
| s1-osk-145-02+01_1a | O | L | ach  | 0.2  | 1 | 80  | 300 | 1 | decrease |

|                     |   |   |     |      |   |     |     |   |          |
|---------------------|---|---|-----|------|---|-----|-----|---|----------|
| s1-osk-147-01+01_1a | O | L | ach | 0.2  | 1 | 120 | 300 | 0 |          |
| s1-osk-147-01+01_2a | O | L | ach | 0.2  | 1 | 120 | 300 | 1 | decrease |
| s1-osk-147-01+01_2b | O | L | ach | 0.2  | 1 | 120 | 300 | 0 |          |
| s1-osk-150-01+01_1a | O | L | ach | 0.15 | 1 | 40  | 300 | 0 |          |
| s1-osk-150-01+01_1b | O | L | ach | 0.15 | 1 | 40  | 300 | 1 | increase |
| s1-osk-150-01+01_1c | O | L | ach | 0.15 | 1 | 40  | 300 | 0 |          |
| s1-osk-155-01+01_1a | O | L | ach | 0.15 | 1 | 40  | 300 | 0 |          |
| s1-osk-155-01+01_1b | O | L | ach | 0.15 | 1 | 40  | 300 | 1 | increase |
| s1-osk-155-02+01_1a | O | L | ach | 0.15 | 1 | 44  | 300 | 1 | decrease |
| s1-osk-155-02+01_1b | O | L | ach | 0.15 | 1 | 44  | 300 | 0 |          |
| s1-osk-157-01+01_2a | O | L | ach | 0.15 | 1 | 48  | 300 | 0 |          |
| s1-osk-159-01+01_1a | O | L | ach | 0.15 | 1 | 44  | 300 | 1 | increase |
| s1-osk-159-01+01_1b | O | L | ach | 0.15 | 1 | 44  | 300 | 1 | decrease |
| s1-osk-160-01+01_1a | O | L | ach | 0.15 | 1 | 44  | 300 | 0 |          |
| s1-osk-160-01+01_1b | O | L | ach | 0.15 | 1 | 44  | 300 | 0 |          |
| s1-osk-160-02+01_1a | O | L | ach | 0.15 | 1 | 52  | 300 | 1 | increase |
| s1-osk-162-01+01_2a | O | L | ach | 0.15 | 1 | 50  | 300 | 1 | decrease |
| s1-osk-164-01+01_2b | O | L | ach | 0.15 | 1 | 44  | 300 | 0 |          |
| s1-osk-165-01+01_2a | O | L | ach | 0.15 | 1 | 38  | 300 | 1 | increase |
| s1-osk-166-01+01_1a | O | L | ach | 0.15 | 1 | 46  | 300 | 0 |          |
| s1-osk-166-01+01_2a | O | L | ach | 0.15 | 1 | 46  | 300 | 1 | increase |
| s1-osk-167-01+01_1a | O | L | ach | 0.1  | 2 | 56  | 300 | 1 | decrease |
| s1-osk-167-01+01_2a | O | L | ach | 0.1  | 2 | 56  | 300 | 1 | decrease |
| s1-osk-168-01+01_2a | O | L | ach | 0.1  | 1 | 60  | 300 | 0 |          |
| s1-osk-169-01+01_1a | O | L | ach | 0.1  | 1 | 30  | 300 | 0 |          |
| s1-osk-169-01+01_2a | O | L | ach | 0.1  | 1 | 30  | 300 | 0 |          |
| s1-osk-177-01+01_2a | O | L | ach | 0.1  | 1 | 34  | 300 | 0 |          |
| s1-osk-180-01+01_1a | O | L | ach | 0.1  | 1 | 40  | 300 | 0 |          |
| s1-osk-180-01+01_2a | O | L | ach | 0.1  | 1 | 40  | 300 | 0 |          |
| s1-osk-182-01+01_1a | O | L | ach | 0.1  | 1 | 44  | 300 | 1 | increase |
| s1-osk-182-01+01_2a | O | L | ach | 0.1  | 1 | 44  | 300 | 0 |          |
| s1-osk-184-01+01_2a | O | L | ach | 0.1  | 1 | 40  | 300 | 1 | decrease |
| s1-osk-184-01+01_2b | O | L | ach | 0.1  | 1 | 40  | 300 | 0 |          |
| s1-osk-185-01+01_2a | O | L | ach | 0.1  | 1 | 40  | 300 | 1 | increase |
| s1-osk-187-01+01_1a | O | L | ach | 0.1  | 1 | 40  | 300 | 0 |          |
| s1-osk-187-01+01_1b | O | L | ach | 0.1  | 1 | 40  | 300 | 0 |          |
| s1-osk-188-01+01_1a | O | L | ach | 0.1  | 1 | 40  | 300 | 0 |          |
| s1-osk-188-01+01_1b | O | L | ach | 0.1  | 1 | 40  | 300 | 0 |          |

|                     |   |   |     |     |   |    |     |   |          |
|---------------------|---|---|-----|-----|---|----|-----|---|----------|
| s1-osk-189-01+01_1a | O | L | ach | 0.1 | 1 | 40 | 300 | 1 | decrease |
| s1-osk-189-01+01_1b | O | L | ach | 0.1 | 1 | 40 | 300 | 1 | increase |
| s1-osk-191-01+01_1d | O | L | ach | 0.2 | 1 | 40 | 300 | 0 |          |
| s1-osk-191-01+01_2a | O | L | ach | 0.2 | 1 | 40 | 300 | 1 | decrease |
| s1-osk-192-01+01_1a | O | L | ach | 0.1 | 1 | 40 | 100 | 1 | increase |
| s1-osk-193-01+01_1c | O | L | ach | 0.1 | 1 | 40 | 100 | 1 | decrease |
| s1-osk-194-01+01_1a | O | L | ach | 0.1 | 1 | 40 | 100 | 1 | increase |
| s1-osk-195-01+01_1a | O | L | ach | 0.1 | 1 | 40 | 100 | 1 | increase |
| s1-osk-195-01+01_1b | O | L | ach | 0.1 | 1 | 40 | 100 | 0 |          |
| s1-osk-196-01+01_1a | O | L | ach | 0.1 | 1 | 40 | 100 | 1 | decrease |
| s1-osk-198-01+01_2a | O | L | ach | 0.1 | 1 | 40 | 100 | 1 | decrease |
| s1-osk-199-01+01_1a | O | L | ach | 0.1 | 1 | 40 | 100 | 0 |          |
| s1-osk-199-01+01_1c | O | L | ach | 0.1 | 1 | 40 | 100 | 0 |          |
| s1-osk-199-02+01_1a | O | L | ach | 0.1 | 1 | 44 | 100 | 0 |          |
| s1-osk-200-01+01_1a | O | L | ach | 0.1 | 1 | 40 | 100 | 1 | increase |
| s1-osk-200-01+02_1a | O | L | ach | 0.1 | 1 | 40 | 100 | 0 |          |
| s2-osk-082-01+01_2a | O | R | ach | 0.1 | 1 | 20 | 300 | 1 | increase |
| s2-osk-083-01+01_2a | O | R | ach | 0.1 | 1 | 40 | 300 | 0 |          |
| s2-osk-084-01+01_1a | O | R | ach | 0.1 | 2 | 80 | 300 | 0 |          |
| s2-osk-086-01+01_1a | O | R | ach | 0.1 | 2 | 70 | 300 | 0 |          |
| s2-osk-088-01+01_2a | O | R | ach | 0.1 | 2 | 60 | 300 | 0 |          |

## Supplementary Table 2

| FileName            | substance | AMI_control   | AMI_injection | IMI_attFix    | IMI_attIn     | IMI_attOut    |
|---------------------|-----------|---------------|---------------|---------------|---------------|---------------|
| s1-pie-015-01+01_2a | sco       | -0.0535580895 | 0.0354876822  | -0.1086334232 | -0.1060722489 | -0.1931284042 |
| s1-pie-022-01+01_3a | sco       | 0.1684081986  | 0.1729437949  | 0.1334329077  | 0.2379867988  | 0.2335748267  |
| s1-pie-023-01+02_2a | sco       | -0.0499473646 | -0.009650813  | 0.2185506481  | 0.1341110185  | 0.0943049223  |
| s1-pie-023-01+03_2a | sco       | 0.0691857939  | 0.0084008352  | -0.003770219  | -0.04499995   | 0.0158637763  |
| s1-pie-026-01+01_3a | sco       | -0.0561741515 | 0.1006524708  | 0.1177187484  | 0.2263121175  | 0.0729414851  |
| s1-pie-027-01+01_3a | sco       | -0.1005017253 | -0.018357868  | -0.1906469688 | -0.0970207441 | -0.1778960451 |
| s1-pie-030-01+01_2a | sco       | 0.1352394995  | -0.031556365  | 0.0333341758  | -0.0807822252 | 0.0864649247  |
| s1-pie-031-01+01_2a | sco       | 0.132882906   | 0.411990571   | -0.2732734137 | -0.0835159544 | -0.3696726498 |
| s1-pie-032-01+01_2a | sco       | 0.1606691971  | 0.104427086   | 0.1629709371  | 0.085140681   | 0.1416526597  |
| s1-pie-035-01+01_2a | sco       | 0.2046446459  | 0.0989244229  | 0.0812719204  | 0.0669160185  | 0.1735674493  |
| s1-pie-037-01+02_2a | sco       | 0.1276151147  | 0.0005161907  | 0.3606726632  | 0.0849981866  | 0.2098384125  |
| s1-pie-037-01+02_2b | sco       | 0.1000222711  | 0.0602566242  | 0.2318032397  | 0.2043897413  | 0.242414294   |
| s1-pie-037-01+02_3a | sco       | -0.0189372934 | 0.0956490149  | -0.1543365484 | -0.101168773  | -0.2130822014 |
| s2-pie-017-02+01_2a | sco       | -0.0591230909 | 0.0242385607  | -0.0610298914 | -0.0095129593 | -0.0926819266 |
| s2-pie-018-01+01_1a | sco       | 0.2496468493  | 0.1617679447  | 0.4109990174  | 0.1734660337  | 0.2608987544  |
| s2-pie-018-01+01_2a | sco       | 0.1354624743  | 0.2605633791  | 0.1784745807  | 0.2199598376  | 0.0929325476  |
| s2-pie-019-01+01_1a | sco       | 0.2218439392  | 0.1385286226  | 0.0423725161  | 0.1062993418  | 0.1905154925  |
| s2-pie-020-01+99_1a | sco       | 0.0916579292  | 0.128989053   | -0.0606797504 | -0.0281678847 | -0.0658755506 |
| s2-pie-023-01+03_1a | sco       | -0.1338691196 | 0.2032100802  | -0.1228847993 | 0.2229351043  | -0.1135220839 |
| s2-pie-024-01+02_2b | sco       | 0.069584343   | -0.165621834  | 0.093179255   | 0.0238502738  | 0.2549626803  |
| s2-pie-024-02+02_1a | sco       | 0.2216268666  | 0.1414651673  | 0.0360650853  | -0.0342559247 | 0.0486382748  |
| s2-pie-035-01+99_1a | sco       | 0.024412149   | 0.0264167339  | -0.0596157196 | 0.0186746824  | 0.0166694283  |
| s2-pie-039-01+02_1a | sco       | 0.1031889734  | 0.1822044701  | -0.079937199  | 0.0130317484  | -0.0675687338 |
| s2-pie-041-02+02_2a | sco       | 0.2396362526  | 0.1682666535  | 0.0323031119  | 0.0640754306  | 0.1377871874  |
| s2-pie-044-01+03_2a | sco       | 0.0474230171  | 0.1519093948  | -0.0230888755 | 0.0260845426  | -0.0793779299 |
| s2-pie-044-01+03_2b | sco       | 0.1488447522  | 0.0680394575  | -0.3359699214 | -0.2114597651 | -0.1321081938 |
| s2-pie-045-01+03_1a | sco       | 0.064606136   | -0.082714219  | 0.1854966049  | 0.1108094296  | 0.2532347582  |
| s2-pie-045-02+03_1a | sco       | -0.0107628267 | 0.1135970578  | -0.0454167641 | 0.072268349   | -0.0524101251 |
| s2-pie-045-02+03_2a | sco       | 0.1289653164  | 0.4797889905  | 0.0185880416  | 0.0707261286  | -0.3114751292 |
| s2-pie-045-02+03_2b | sco       | 0.147513426   | 0.0904384365  | -0.0713458228 | -0.1168023375 | -0.0593566729 |
| s2-pie-048-01+04_1a | sco       | 0.1087153409  | 0.128728729   | -0.0169709283 | 0.1114611793  | 0.0913704473  |
| s2-pie-053-03+02_1a | sco       | 0.0053928438  | -0.228270598  | -0.0058133218 | -0.2559050764 | -0.0239598612 |
| s2-pie-054-01+02_2a | sco       | 0.0835706584  | 0.004402266   | 0.0736791485  | -0.0255889777 | 0.0537174143  |
| s2-pie-055-01+02_1a | sco       | 0.0693711963  | -0.053786334  | 0.0011145707  | -0.071622962  | 0.0515295965  |
| s2-pie-055-01+02_1b | sco       | 0.018865664   | 0.2776144926  | 0.0757438357  | 0.1228099766  | -0.1418318647 |
| s2-pie-055-02+02_1a | sco       | 0.0080269057  | -0.118798682  | -0.0521561807 | -0.0729931822 | 0.0542129753  |

|                     |      |               |              |               |               |               |
|---------------------|------|---------------|--------------|---------------|---------------|---------------|
| s2-pie-055-02+02_1b | sco  | 0.0247116426  | -0.039498411 | 0.005895051   | -0.0183206688 | 0.0458806921  |
| s2-pie-058-01+02_1a | sco  | -0.0126372885 | 0.0720914902 | 0.0248274482  | 0.11009374    | 0.0256814236  |
| s2-pie-059-01+02_1a | sco  | 0.1560631492  | 0.149883057  | 0.0036870258  | -0.0982243782 | -0.0919534197 |
| s2-pie-059-01+02_1b | sco  | 0.057231626   | 0.1089427683 | -0.1286942841 | 0.08819621    | 0.036327346   |
| s2-pie-060-01+02_1a | sco  | -0.0961176153 | -0.033777467 | 0.0628823048  | 0.0057183089  | -0.0568452233 |
| s2-pie-061-02+02_1a | sco  | 0.0826487949  | -0.119018998 | -0.0398083995 | -0.2348195305 | -0.0368439444 |
| s2-pie-067-03+01_1a | sco  | -0.1008923798 | -0.044775386 | -0.0569464169 | 0.0813083032  | 0.0250514741  |
| s2-pie-067-03+01_2a | sco  | -0.1454186288 | -0.070000444 | -0.1003021788 | 0.0022522605  | -0.0739542206 |
| s2-pie-075-01+01_1a | sco  | 0.102155949   | 0.164761913  | 0.0518172325  | 0.1213920452  | 0.0581639003  |
| s3-pie-001-01+02_3a | sco  | 0.0558461579  | 0.0861090317 | 0.0844617296  | -0.0296453335 | -0.0600003508 |
| s3-pie-001-01+99_2a | sco  | 0.103534238   | 0.1828660151 | -0.0903613489 | 0.009001855   | -0.0719132345 |
| s3-pie-005-01+01_3a | sco  | -0.0223381173 | -0.119541604 | -0.0263757033 | -0.0571511013 | 0.0405384514  |
| s3-pie-006-01+01_3b | sco  | 0.1488361614  | 0.1579443683 | -0.1207771501 | -0.0567480709 | -0.0660405902 |
| s3-pie-009-01+01_3a | sco  | 0.3291881623  | 0.2838203903 | 0.0140216512  | -0.1143477137 | -0.0646744664 |
| s3-pie-012-01+01_3a | sco  | 0.0787003091  | -0.084405223 | 0.0940543961  | -0.0569896906 | 0.1060185018  |
| s3-pie-014-01+01_2a | sco  | 0.1914999215  | 0.214799178  | 0.0745460532  | 0.0253425827  | 0.0010444635  |
| s3-pie-014-01+03_2a | sco  | 0.0091859043  | 0.0425318503 | -0.0113212677 | 0.01432863    | -0.0190394498 |
| s3-pie-017-01+01_3a | sco  | 0.1997246157  | 0.3350543798 | -0.2847044865 | -0.2738563046 | -0.4028893343 |
| s3-pie-018-01+01_3a | sco  | -0.0536633898 | -0.141213575 | -0.4821966246 | -0.480895877  | -0.410074162  |
| s3-pie-018-01+01_3b | sco  | 0.6463003282  | 0.6247583767 | 0.1157315201  | 0.1108507578  | 0.1463953936  |
| s3-pie-020-01+01_1a | sco  | 0.0958865489  | 0.2137908434 | -0.0749070119 | -0.0621488451 | -0.1811654292 |
| s3-pie-020-01+02_1a | sco  | 0.2075340296  | 0.4464100097 | -0.1933280226 | -0.2636841966 | -0.4927446315 |
| s3-pie-021-01+01_1a | sco  | 0.5401214125  | 0.6659849088 | -0.4316288168 | -0.1359040244 | -0.3238264333 |
| s3-pie-023-01+01_1a | sco  | 0.1730205352  | 0.0973204802 | 0.3599426272  | 0.3097961967  | 0.3777814422  |
| s3-pie-023-01+01_3a | sco  | 0.1663966396  | 0.1577383647 | 0.0342387739  | 0.0679828744  | 0.0768280887  |
| s3-pie-037-01+01_3a | sco  | 0.1410575047  | 0.0075185489 | 0.0746677109  | -0.0434353762 | 0.090772422   |
| s2-pie-032-02+02_2a | nacl | 0.275736928   | 0.2086985825 | -0.1059655827 | -0.017241014  | 0.0539568403  |
| s2-pie-037-01+01_1a | nacl | -0.2886401817 | 0.0317931518 | -0.2433964859 | 0.2873786692  | -0.0331673199 |
| s2-pie-046-01+03_2a | nacl | -0.0446717556 | 0.0130029433 | 0.0263583361  | -0.0335384673 | -0.0910037561 |
| s2-pie-063-03+01_1a | nacl | 0.0313894971  | 0.181764415  | -0.0382616005 | 0.0268878717  | -0.1248576615 |
| s2-pie-080-01+02_1a | nacl | 0.118084729   | 0.0167586396 | -0.1606386976 | -0.0293421274 | 0.0724005604  |
| s2-pie-083-02+01_1a | ach  | 0.1300305874  | 0.2937489234 | -0.120253322  | 0.1207888292  | -0.0504689701 |
| s2-pie-085-01+02_2a | ach  | 0.0396646716  | 0.2730685045 | -0.0621885815 | 0.0322394666  | -0.2052817059 |
| s2-pie-086-04+01_1a | ach  | 0.0100410413  | 0.0235325675 | -0.0906480982 | 0.0318500391  | 0.0183632168  |
| s2-pie-089-02+01_1a | ach  | 0.0966340422  | 0.060668538  | 0.2961922074  | 0.2115548916  | 0.2458508608  |
| s2-pie-090-01+02_2a | ach  | 0.0865946054  | 0.1366521658 | -0.0143169979 | 0.1264042656  | 0.076235419   |
| s2-pie-090-01+02_2b | ach  | -0.0133903522 | -0.012471768 | -0.0128753132 | -0.0604088404 | -0.0613241741 |

|                         |               |              |               |               |               |
|-------------------------|---------------|--------------|---------------|---------------|---------------|
| s1-osk-125-03+01_1a sco | -0.0370274422 | 0.0781399311 | 0.0201979595  | 0.0914748859  | -0.0236082259 |
| s1-osk-125-03+01_2a sco | 0.0334230305  | 0.0516974248 | -0.0268345998 | -0.0106638326 | -0.0289642034 |
| s1-osk-204-02+01_2a sco | 0.2284723612  | -0.119928067 | -0.0266412986 | -0.1755599876 | 0.1739018356  |
| s1-osk-205-01+01_2b sco | 0.06482903    | 0.1125838046 | -0.3136747753 | -0.4002879422 | -0.4399225874 |
| s1-osk-206-01+01_1a sco | 0.0054937494  | 0.0406172917 | -0.1601130138 | -0.10821416   | -0.1428026468 |
| s1-osk-207-02+01_2a sco | 0.016453871   | -0.023536538 | -0.0071987684 | -0.0374498792 | 0.0025288344  |
| s1-osk-207-02+01_2b sco | -0.2675976826 | -0.193802243 | 0.5533445538  | 0.8072661947  | 0.7783381116  |
| s1-osk-208-01+01_1a sco | 0.0342612234  | 0.0318270779 | -0.0117354326 | 0.0616148866  | 0.0640420738  |
| s1-osk-208-01+01_2a sco | 0.185577271   | 0.3576704333 | -0.5894664432 | -0.1415770995 | -0.3176164102 |
| s1-osk-209-01+01_1a sco | 0.2022327082  | 0.0338481985 | 0.2773392685  | 0.2373025315  | 0.3911118247  |
| s1-osk-210-01+01_1a sco | 0.0326635667  | -0.106268146 | 0.1421023391  | -0.1654651099 | -0.0276473431 |
| s1-osk-211-01+01_1a sco | 0.1190445993  | 0.1598736291 | -0.2206897385 | -0.1984117436 | -0.2380669241 |
| s1-osk-211-01+01_2a sco | -0.0564654158 | 0.1545429084 | 0.2042289234  | 0.2403609402  | 0.0328286186  |
| s1-osk-212-01+01_1a sco | 0.1037600969  | 0.0147188703 | -0.3349725666 | -0.4429967287 | -0.3683719543 |
| s1-osk-213-01+01_1a sco | 0.1919575354  | 0.1369335826 | -0.0061910111 | -0.0677711303 | -0.0113051006 |
| s1-osk-214-01+01_1a sco | 0.0909248457  | 0.0757559967 | -0.1068357882 | -0.1255061286 | -0.1104437897 |
| s1-osk-215-01+01_2a sco | 0.3032345634  | 0.0324809407 | -0.1395671398 | -0.2977538723 | -0.0264614663 |
| s2-osk-010-02+01_2a sco | 0.075377177   | -0.092647203 | -0.2866225486 | -0.4025632446 | -0.2526767615 |
| s2-osk-013-03+02_2a sco | 0.0792575715  | -0.001745245 | 0.0036772347  | -0.0618541851 | 0.0192337832  |
| s2-osk-014-03+01_2a sco | 0.0616022149  | 0.1713205709 | 0.1803425042  | 0.1143746724  | 0.0035308088  |
| s2-osk-015-01+01_2a sco | 0.0933582509  | 0.0720750359 | -0.0997601985 | -0.0681676035 | -0.0468085789 |
| s2-osk-016-03+01_1a sco | 0.0454214464  | 0.0795492573 | 0.0486638694  | 0.0487617393  | 0.0145344441  |
| s2-osk-018-03+01_1a sco | 0.0615727334  | 0.0891140229 | 0.0012959108  | -0.0573437201 | -0.0849021349 |
| s2-osk-019-01+01_2a sco | 0.0491601612  | 0.0582235559 | -0.0542074296 | 0.004365278   | -0.0047243206 |
| s2-osk-021-02+01_2a sco | 0.0683044568  | 0.2748621331 | -0.0459680273 | -0.0151323625 | -0.2249257124 |
| s2-osk-022-01+01_1a sco | -0.198389419  | 0.1641791885 | -0.4816839014 | -0.2297254357 | -0.537500317  |
| s2-osk-022-01+01_2a sco | -0.0165870494 | -0.01009371  | -0.2754221934 | -0.1556933938 | -0.1620239923 |
| s2-osk-022-01+01_2b sco | 0.020856063   | -0.052800953 | -0.181785562  | 0.2282142653  | 0.2968065519  |
| s2-osk-023-01+01_1a sco | 0.0181740847  | -0.151798494 | 0.0690691194  | -0.1988791187 | -0.0303989487 |
| s2-osk-025-01+01_2a sco | -0.0036356569 | 0.1639302779 | 0.1041878452  | -0.0284923493 | -0.195027899  |
| s2-osk-026-01+01_2a sco | 0.0289948691  | 0.0387378097 | -0.1074664819 | 0.0235154672  | 0.0137647282  |
| s2-osk-029-02+01_1a sco | -0.1759479981 | 0.1620582441 | -0.0472868296 | 0.2519923192  | -0.0835634605 |
| s2-osk-029-02+01_1b sco | 0.0455443316  | -0.021508295 | -0.1953976932 | 0.0717521875  | 0.1380755401  |
| s2-osk-029-02+01_2a sco | 0.1730860454  | 0.215049821  | 0.2130757387  | 0.0785625004  | 0.0350965348  |
| s2-osk-030-01+01_1a sco | 0.1033668609  | 0.1056939861 | 0.0434661447  | 0.0584024959  | 0.0560573683  |
| s2-osk-031-01+01_1a sco | 0.1075144227  | 0.1863072273 | 0.2404162494  | 0.0391011851  | -0.0414324137 |
| s2-osk-032-01+01_1a sco | -0.0149557408 | -0.159315638 | 0.0872193647  | -0.2549289315 | -0.1144460979 |



|                          |               |              |               |               |               |
|--------------------------|---------------|--------------|---------------|---------------|---------------|
| s2-osk-034-01+01_1a sco  | 0.0120392572  | 0.081454124  | -0.0379990963 | 0.0068217986  | -0.0626909219 |
| s2-osk-036-01+01_1a sco  | -0.1068509611 | -0.256225117 | -0.0493418714 | -0.1936375495 | -0.041286533  |
| s2-osk-038-01+01_1a sco  | -0.0400587484 | 0.0419256216 | 0.2681207142  | 0.2086381879  | 0.1289940313  |
| s2-osk-038-01+01_1b sco  | 0.1098122481  | 0.1091722414 | 0.2688508676  | 0.2213283736  | 0.2219443259  |
| s2-osk-038-02+01_1a sco  | -0.0342778505 | 0.0918929131 | 0.1287703847  | 0.036990774   | -0.0891988108 |
| s2-osk-039-01+01_2a sco  | 0.2253163869  | 0.2283011204 | -0.101360867  | 0.0705025126  | 0.067370864   |
| s2-osk-040-01+01_2b sco  | 0.2633345118  | -0.164476982 | 0.5872331336  | 0.3938409461  | 0.6921184808  |
| s2-osk-040-01+99_2a sco  | -0.0822778188 | 0.0306561872 | -0.1388623531 | -0.0453935853 | -0.1572393954 |
| s2-osk-041-02+01_1a sco  | -0.0982629373 | -0.217394618 | 0.1195052443  | -0.2681884039 | -0.1513990481 |
| s2-osk-041-02+01_1b sco  | 0.0331190108  | 0.3051040883 | 0.1618740512  | 0.0690559752  | -0.2096840252 |
| s2-osk-042-02+01_1a sco  | 0.0595081027  | 0.1258781683 | 0.0405957072  | 0.0109891072  | -0.0559229687 |
| s2-osk-042-02+01_2a sco  | -0.023621809  | 0.071792917  | 0.0119612224  | 0.0100264499  | -0.085308212  |
| s2-osk-048-01+01_1a sco  | 0.0303525801  | -0.023622559 | -0.0273680273 | -0.0113370897 | 0.042625441   |
| s2-osk-049-01+01_1a sco  | 0.1322065735  | 0.0301288234 | -0.0068864621 | -0.0217306967 | 0.0809355293  |
| s2-osk-049-01+01_2b sco  | -0.1066732545 | 0.1442394544 | 0.2737100722  | 0.466122429   | 0.2475224532  |
| s2-osk-051-01+01_2a sco  | 0.1248383093  | 0.0957174246 | 0.0919449091  | 0.0175458799  | 0.0469946419  |
| s2-osk-052-01+01_2a sco  | 0.0136148539  | 0.0063453899 | 0.0807914205  | 0.0870784871  | 0.0942888879  |
| s2-osk-053-01+01_1a sco  | 0.138358665   | 0.13039579   | -0.1652967225 | -0.0627757153 | -0.0546943822 |
| s2-osk-054-02+01_2a sco  | -0.0351264252 | 0.0452238512 | 0.0387706543  | 0.1150046975  | 0.0351057449  |
| s2-osk-055-01+01_1a sco  | 0.3226965306  | -0.018164732 | 0.1684208329  | -0.1230764807 | 0.2251905412  |
| s2-osk-060-02+01_2a sco  | 0.1135081837  | -0.439915988 | -0.1745677694 | -0.7664816496 | -0.4016511292 |
| s2-osk-062-01+01_2a sco  | 0.1321904991  | -0.029127985 | -0.1038396343 | -0.2375413594 | -0.0798913178 |
| s2-osk-062-03+01_1a sco  | 0.0806662247  | 0.0053777478 | -0.091966614  | -0.0859970271 | -0.0107454784 |
| s2-osk-070-01+01_1a sco  | 0.2488165493  | 0.1905675511 | 0.1768702035  | 0.180570419   | 0.2390790386  |
| s2-osk-071-01+01_2a sco  | 0.0498270684  | 0.1336991708 | -0.034371633  | 0.0341931808  | -0.0503868825 |
| s2-osk-071-02+01_1a sco  | -0.1709051074 | 0.0009974995 | 0.1027041132  | 0.0412431651  | -0.1315627367 |
| s2-osk-072-01+01_1a sco  | 0.0146115857  | 0.0379942621 | -0.0944142076 | -0.0758185906 | -0.099038578  |
| s2-osk-073-01+01_2a sco  | 0.1718233307  | 0.1276917694 | -0.3203660275 | -0.3013747765 | -0.2597859272 |
| s2-osk-073-01+01_2b sco  | -0.0527759943 | 0.1033465372 | -0.1305953865 | -0.0671519788 | -0.2201322698 |
| s2-osk-075-01+01_2a sco  | 0.1593267997  | -0.015602188 | 0.0738346731  | -0.0008498375 | 0.1736711355  |
| s2-osk-076-01+01_2a sco  | -0.0031870377 | 0.0026272223 | 0.0847076358  | 0.0367260387  | 0.0309184295  |
| s1-osk-202-01+01_2a nacl | -0.0083520001 | -0.066674758 | -0.0381751838 | -0.0422883814 | 0.0161066194  |
| s2-osk-006-02+01_1a nacl | 0.0728252951  | 0.1911808313 | -0.1150679604 | 0.0288059057  | -0.0915372253 |
| s2-osk-006-02+01_1b nacl | -0.101186927  | -0.384282057 | 0.1217412398  | -0.0852829459 | 0.2146576924  |
| s2-osk-007-01+02_2a nacl | -0.0864650344 | -0.041678442 | -0.104721591  | 0.0047287003  | -0.0402284246 |
| s2-osk-008-01+01_2a nacl | 0.0204161639  | -0.150009994 | -0.0074507402 | -0.0347432758 | 0.1359651374  |
| s2-osk-011-02+01_2a nacl | 0.2451809436  | 0.2082803642 | 0.1214962463  | 0.0393902081  | 0.0781568572  |

|                          |               |              |               |               |               |
|--------------------------|---------------|--------------|---------------|---------------|---------------|
| s2-osk-044-01+01_2a nacl | -0.0574538829 | -0.07442983  | -0.0932299502 | -0.0060957934 | 0.0109541983  |
| s2-osk-044-02+01_2a nacl | 0.0526484358  | 0.1230617542 | 0.0660356791  | 0.0489680225  | -0.0219807634 |
| s2-osk-044-02+01_2b nacl | 0.1390773123  | 0.1231485901 | 0.0358877684  | 0.0469879042  | 0.0631461086  |
| s2-osk-044-03+01_2a nacl | 0.1560158198  | 0.0129789167 | 0.0321037226  | -0.0530244156 | 0.0909942545  |
| s2-osk-045-01+02_1a nacl | 0.1351249782  | 0.1488386449 | 0.1221415877  | 0.0036125161  | -0.0103831432 |
| s2-osk-045-01+02_2a nacl | 0.1563908529  | 0.0897934974 | -0.3529952889 | -0.4001993348 | -0.3418954986 |
| s2-osk-046-01+01_2a nacl | 0.0486871325  | 0.0358668082 | -0.0489697038 | -0.1059493917 | -0.0932335019 |
| s2-osk-066-01+01_1b nacl | 0.2842487891  | 0.128925535  | 0.0355912405  | -0.0492913254 | 0.1128373387  |
| s2-osk-067-01+01_1a nacl | 0.1040603555  | 0.1167698244 | 0.0049279894  | 0.1697868052  | 0.1572645379  |
| s2-osk-067-02+01_1a nacl | 0.0676050881  | 0.0391604241 | -0.0377914028 | -0.1026796654 | -0.0743773053 |
| s2-osk-068-01+01_1a nacl | 0.041206875   | 0.0898598388 | -0.0940777893 | 0.0326166654  | -0.016242994  |
| s2-osk-069-01+01_1a nacl | -0.2707107441 | -0.015088177 | -0.1110984372 | 0.1699240547  | -0.0907028588 |
| s2-osk-074-01+01_1a nacl | 0.0377862258  | 0.4177375802 | -0.8096061614 | -0.835234139  | -0.923505802  |
| s2-osk-074-01+01_1b nacl | 0.1922722129  | 0.0103465417 | -0.5119070603 | -0.6346992269 | -0.5116024239 |
| s2-osk-074-01+01_2a nacl | 0.1408290539  | 0.0568666825 | 0.0320146839  | -0.0186430144 | 0.0661015012  |
| s2-osk-074-02+01_1a nacl | 0.0178460913  | -0.09483382  | 0.1015450413  | 0.0723688233  | 0.1833656245  |
| s2-osk-087-01+01_2a nacl | 0.1962014408  | 0.1843687497 | 0.0181929659  | 0.0579234472  | 0.0701503467  |
| s1-osk-090-01+01_2a ach  | -0.1244382502 | -0.222646524 | 0.1075533402  | 0.0067956192  | 0.1077284143  |
| s1-osk-090-01+01_2b ach  | 0.2392497064  | 0.0121062507 | 0.1825292522  | -0.0432484673 | 0.1863911537  |
| s1-osk-091-01+01_2a ach  | 0.0681208636  | 0.2283709448 | 0.1837522472  | 0.166981292   | 0.0043161524  |
| s1-osk-092-01+01_2a ach  | 0.320622959   | 0.168104419  | -0.004683845  | 0.036326225   | 0.1963835065  |
| s1-osk-094-01+01_1a ach  | 0.09199941    | 0.0968496717 | -0.1887556656 | 0.1067494742  | 0.1019088465  |
| s1-osk-095-01+01_2a ach  | 0.2593935581  | 0.5370606737 | -0.0040024422 | 0.101057113   | -0.2290193116 |
| s1-osk-095-01+01_2b ach  | 0.2884601747  | -0.273382385 | -0.0766670486 | -0.3470793051 | 0.2120171204  |
| s1-osk-098-01+02_2b ach  | 0.1172218038  | 0.094899769  | 0.7022154516  | 0.6246248579  | 0.6381995508  |
| s1-osk-100-02+01_1a ach  | -0.0160702568 | -0.025151309 | -0.032685085  | -0.0155860076 | -0.0065022045 |
| s1-osk-106-01+01_1a ach  | 0.0350336724  | 0.0310827611 | 0.037816429   | 0.01488782    | 0.0188419288  |
| s1-osk-107-02+01_1a ach  | 0.077999096   | -0.02754441  | 0.1336141841  | 0.0338193564  | 0.1386427822  |
| s1-osk-109-01+01_1a ach  | -0.4012709307 | 0.0610794491 | -0.0741062492 | 0.2757403515  | -0.2004990358 |
| s1-osk-110-01+01_1a ach  | -0.0476854283 | -0.198902942 | -0.153744049  | -0.1766668199 | -0.0246665897 |
| s1-osk-115-01+01_1a ach  | 0.2221766502  | -0.156152002 | 0.2223879725  | -0.0603061255 | 0.3122218002  |
| s1-osk-115-01+01_1b ach  | -0.0168349491 | 0.2016634395 | 0.1246929488  | 0.1808567534  | -0.0384152603 |
| s1-osk-116-01+01_1a ach  | 0.0876236328  | 0.4036445544 | 0.2026690007  | 0.2769389186  | -0.0557248807 |
| s1-osk-117-01+01_1a ach  | 0.09183085    | 0.1081284267 | 0.0810524515  | 0.1052349653  | 0.0889279862  |
| s1-osk-130-01+01_1a ach  | 0.3227131654  | 0.1566440881 | 0.3078461033  | -0.1541244039 | 0.0213625115  |
| s1-osk-132-01+01_2a ach  | 0.3179598067  | 0.156394281  | 0.3241389874  | 0.189835351   | 0.348604      |
| s1-osk-134-02+01_1b ach  | 0.1459874132  | -0.292933541 | 0.4446124486  | -0.1164330092 | 0.320179116   |

|                         |               |              |               |               |               |
|-------------------------|---------------|--------------|---------------|---------------|---------------|
| s1-osk-134-03+01_1a ach | -0.1803900471 | 0.0869334107 | -0.0159980559 | 0.069827587   | -0.1969887787 |
| s1-osk-136-01+01_2a ach | 0.1032606238  | 0.0956094519 | 0.058338988   | -0.020638775  | -0.0129133717 |
| s1-osk-143-01+01_2b ach | -0.2431942296 | 0.1400224923 | -0.2209378338 | 0.2461074737  | -0.13698322   |
| s1-osk-145-01+01_1a ach | 0.0027311797  | -0.007610749 | 0.0829157087  | 0.0577140499  | 0.0680151681  |
| s1-osk-145-02+01_1a ach | 0.0824081675  | 0.0390216936 | -0.3411715495 | -0.417789466  | -0.3811950128 |
| s1-osk-147-01+01_1a ach | 0.0184282593  | 0.270301303  | -0.0623101972 | 0.0186620386  | -0.2355848131 |
| s1-osk-147-01+01_2a ach | 0.0300410321  | 0.0260639584 | -0.1579837482 | -0.2322141846 | -0.2284451365 |
| s1-osk-147-01+01_2b ach | 0.0122370772  | -0.075663037 | 0.006916238   | 0.1523502339  | 0.236998187   |
| s1-osk-150-01+01_1a ach | 0.1258822168  | 0.1283880111 | -0.2273051509 | 0.1745463078  | 0.1720758486  |
| s1-osk-150-01+01_1b ach | 0.080876898   | 0.0291666643 | 0.1113098614  | -0.145892649  | -0.0947768478 |
| s1-osk-150-01+01_1c ach | -0.2692130794 | -0.002117368 | -0.0956885843 | -0.0492843401 | -0.3124174938 |
| s1-osk-155-01+01_1a ach | -0.188611366  | -0.204928683 | -0.0557296615 | -0.249817555  | -0.2338357058 |
| s1-osk-155-01+01_1b ach | 0.0942111731  | 0.213324836  | 0.1865659097  | 0.1809368184  | 0.0607155427  |
| s1-osk-155-02+01_1a ach | 0.0760173288  | 0.0588044824 | -0.1136893927 | -0.0668921113 | -0.0496594101 |
| s1-osk-155-02+01_1b ach | 0.3844180499  | 0.0854084887 | 0.1568592824  | 0.091968781   | 0.3900388562  |
| s1-osk-157-01+01_2a ach | 0.3179531056  | 0.1530799557 | 0.0447539019  | 0.0556185423  | 0.226741407   |
| s1-osk-159-01+01_1a ach | -0.0227088228 | -0.013046996 | 0.1764947817  | 0.072973614   | 0.0633536046  |
| s1-osk-159-01+01_1b ach | 0.1308641249  | -0.09618827  | -0.4579958146 | -0.6326185345 | -0.4758953513 |
| s1-osk-160-01+01_1a ach | 0.0728186688  | -0.106202764 | -0.0606267108 | -0.141687946  | 0.0368881345  |
| s1-osk-160-01+01_1b ach | 0.0926664956  | 0.319524146  | -0.0577034392 | 0.0173837632  | -0.2172789275 |
| s1-osk-160-02+01_1a ach | 0.0579585304  | 0.0214088893 | 0.2547258328  | 0.2432194163  | 0.2773459131  |
| s1-osk-162-01+01_2a ach | 0.0876839641  | 0.1043952135 | -0.2090311345 | -0.1991034428 | -0.2152462784 |
| s1-osk-164-01+01_2b ach | -0.1674812308 | -0.048006043 | 0.3011036556  | 0.1272826763  | 0.006945587   |
| s1-osk-165-01+01_2a ach | -0.1922843002 | -0.063283401 | 0.3604872709  | 0.4407204586  | 0.3290696543  |
| s1-osk-166-01+01_1a ach | 0.2751056472  | 0.3661803091 | 0.3253822077  | 0.0766789531  | -0.0247907138 |
| s1-osk-166-01+01_2a ach | -0.0613989446 | 0.0340714603 | 0.1885393006  | 0.2586895555  | 0.1675477751  |
| s1-osk-167-01+01_1a ach | -0.0359034667 | 0.1077944447 | -0.2467980811 | -0.0006334817 | -0.1437643619 |
| s1-osk-167-01+01_2a ach | -0.0521084321 | 0.2824687773 | -0.5127192161 | -0.44339122   | -0.6745048229 |
| s1-osk-168-01+01_2a ach | 0.0700661651  | 0.0217044427 | 0.0191043096  | -0.0240451942 | 0.024418625   |
| s1-osk-169-01+01_1a ach | 0.0130576394  | -0.005959473 | -0.0563310669 | 0.0288361216  | 0.0478255294  |
| s1-osk-169-01+01_2a ach | 0.0905087646  | 0.0348425351 | 0.0850834638  | 0.3421900117  | 0.3905690804  |
| s1-osk-177-01+01_2a ach | -0.0802273663 | -0.203531573 | 0.2342273423  | 0.1214569452  | 0.2431067436  |
| s1-osk-180-01+01_1a ach | 0.1265158972  | 0.1638582525 | -0.1316743728 | -0.13789877   | -0.1751108293 |
| s1-osk-180-01+01_2a ach | -0.069610597  | -0.020367646 | 0.0111845373  | 0.0533038964  | 0.0040015475  |
| s1-osk-182-01+01_1a ach | -0.0482472053 | 0.0217719973 | 0.1522599054  | 0.1625482888  | 0.0936675182  |
| s1-osk-182-01+01_2a ach | -0.1796957182 | 0.1061139738 | -0.0664019477 | -0.1450145102 | -0.4088480238 |
| s1-osk-184-01+01_2a ach | 0.031001068   | 0.0360225713 | -0.2401351041 | -0.3243263031 | -0.3288173079 |

|                         |               |              |               |               |               |
|-------------------------|---------------|--------------|---------------|---------------|---------------|
| s1-osk-184-01+01_2b ach | -0.0525152114 | 0.3088932816 | -0.0786948741 | 0.0002199357  | -0.35544732   |
| s1-osk-185-01+01_2a ach | -0.0525913194 | 0.164975409  | 0.1299380409  | 0.0378208157  | -0.1793374754 |
| s1-osk-187-01+01_1a ach | -0.1328995598 | 0.0430441502 | 0.0764459358  | -0.0738988926 | -0.245665843  |
| s1-osk-187-01+01_1b ach | 0.303628068   | 0.1057074808 | -0.0299358503 | -0.0011466263 | 0.2033847053  |
| s1-osk-188-01+01_1a ach | 0.2232665474  | 0.0978814942 | -0.1589055493 | -0.4561883944 | -0.3483739109 |
| s1-osk-188-01+01_1b ach | 0.1060920759  | 0.1406738093 | -0.012885462  | 0.0071063114  | -0.0280063389 |
| s1-osk-189-01+01_1a ach | 0.1087971037  | 0.1949740166 | -0.1798560467 | -0.0820239344 | -0.1688491141 |
| s1-osk-189-01+01_1b ach | 0.3955548046  | 0.1716554646 | 0.6155946646  | 0.564636242   | 0.7087211066  |
| s1-osk-191-01+01_1d ach | 0.1762795015  | 0.0713714838 | -0.0592462974 | -0.1951065502 | -0.0907428448 |
| s1-osk-191-01+01_2a ach | -0.1506806506 | -0.108038458 | -0.2874021594 | -0.3048167416 | -0.3436242467 |
| s1-osk-192-01+01_1a ach | 0.1735860344  | 0.1786782164 | 0.2645991135  | 0.1430913944  | 0.1379399444  |
| s1-osk-193-01+01_1c ach | 0.0658461468  | 0.0223209856 | -0.2412452454 | -0.3426966599 | -0.30364322   |
| s1-osk-194-01+01_1a ach | 0.3676564627  | 0.0505467262 | 0.4212925338  | 0.1032633498  | 0.4126106724  |
| s1-osk-195-01+01_1a ach | 0.1025915064  | -0.026129566 | 0.1305271999  | 0.0084562649  | 0.1366848177  |
| s1-osk-195-01+01_1b ach | 0.0389846401  | 0.0528850188 | -0.0300471983 | -0.021242878  | -0.0351615702 |
| s1-osk-196-01+01_1a ach | 0.0622994109  | 0.0644537098 | -0.262797071  | -0.2117749801 | -0.2138400115 |
| s1-osk-198-01+01_2a ach | 0.0057142114  | -0.102357949 | -0.18171844   | 0.0243203596  | 0.1319826519  |
| s1-osk-199-01+01_1a ach | 0.0198636206  | -0.00414533  | -0.0107654513 | 0.0876544251  | 0.1114269214  |
| s1-osk-199-01+01_1c ach | 0.0952229627  | 0.0027909098 | 0.0017361922  | -0.0405951611 | 0.0520568476  |
| s1-osk-199-02+01_1a ach | -0.0021719667 | 0.1004658825 | 0.085278262   | 0.060918109   | -0.0419596442 |
| s1-osk-200-01+01_1a ach | 0.0245171373  | 0.1019830826 | 0.1012939413  | 0.0612003585  | -0.0165383669 |
| s1-osk-200-01+02_1a ach | 0.0029937284  | 0.130638374  | -0.0468193336 | 0.0115467238  | -0.1163193702 |
| s2-osk-082-01+01_2a ach | -0.0817960578 | 0.0463271587 | 0.0954158997  | 0.1245043713  | -0.0031857983 |
| s2-osk-083-01+01_2a ach | 0.1977631794  | 0.1775377608 | 0.0024593782  | -0.0771109571 | -0.0562404797 |
| s2-osk-084-01+01_1a ach | 0.0224760089  | 0.0688599396 | 0.0511518316  | 0.0620195864  | 0.0156087276  |
| s2-osk-086-01+01_1a ach | -0.0076209344 | 0.1049329515 | -0.0132623879 | 0.0214925635  | -0.0911918098 |
| s2-osk-088-01+01_2a ach | 0.0343291775  | 0.1994072646 | 0.019959995   | -0.0108127914 | -0.176711112  |
